# Supplementary material
Source: PubMed Central journal article supplement (PMC3105749)
Supplement: ismej2010173x4.pdf [file ismej2010173x4.pdf]

Table S1. C, N, O 1s and Fe 2p NEXAFS-derived atomic ratios for cell, stalk, and particles in *M. ferrooxydans* culture sample.

|      | cell   | stalk     | particles |
|------|--------|-----------|-----------|
| C:Fe | 105±25 | 2.9±0.4   | 2.4±0.4   |
| C:N  | 3±0.7  | 15.3±3    | 10±2      |
| C:O  | 3±0.5  | 0.4±0.07  | 0.3±0.07  |
| N:O  | 1±0.2  | 0.03±0.01 | 0.03±0.01 |
| O:Fe | 35±9   | 6.8±1.5   | 8.3±1.7   |
